# The Expression of Thyrotropin Receptor in the Brain\*

PATRICIA CRISANTI, BOUBAKER OMRI, ELEANOR J. HUGHES†, GERI MEDURI, CHRISTIANE HERY, ERIC CLAUSER, CLAUDE JACQUEMIN, AND BERTRAND SAUNIER‡

*Unité de Recherches sur la Glande Thyroïde et la Régulation Hormonale, XR 96 INSERM (E.J.H., C.J., B.S.), Unité de Recherches Hormones et Reproduction, U-135, INSERM (G.M.), and Laboratoire Virus, Neurones et Immunité, Faculté de Médecine (C.H.), 94276 Le Kremlin-Bicêtre; Unité de Recherches sur le Développement, Vieillessement et la Pathologie de la Rétine, U-450 INSERM (P.C., B.O.), 75016 Paris; and Service Commun de Biologie Moléculaire de l'Hôpital Saint-Antoine (E.C.), 75012 Paris, France*

## ABSTRACT

The regulation of the thyroid gland by TSH is mediated by a heterotrimeric G protein-coupled receptor. Nonthyroid effects of TSH have been reported, and expression of its receptor has been described in adipocytes and lymphocytes. We have previously reported the existence of specific and saturable binding sites of TSH and specific TSH effects in primary cultured rat brain astroglial cells. We now report expression of the TSH receptor gene in these cells; the coding sequence of the corresponding complementary DNA is identical to that previously established in thyroid. Using specific antisense RNA probe, expression of this gene was detected in some isolated or clustered glial fibrillary acidic protein-positive primary cultured cells by *in situ* hybridization. With this technique, we further detected TSH

receptor messenger RNA (mRNA) expression in rat brain cryoslices in both neuronal cells and astrocytes. Its presence predominated in neuron-rich areas (pyriform and postcingulate cortex, hippocampus, and hypothalamic nuclei) and was mostly colocalized with neuron-specific enolase. In astrocytes, this mRNA was detected in the ependymal cell layer and the subependymal zone, and several isolated cells were also found in the brain parenchyma. We also detected TSH receptor mRNA and protein in primary cultured human astrocytes. The protein was detected as well in both rat and human brain cryoslices. Together, these findings clearly demonstrate the expression of the TSH receptor gene in the brain in both neuronal cells and astrocytes. (*Endocrinology* 142: 812–822, 2001)

TSH WAS identified a long time ago as the most important factor regulating the production of thyroid hormones by the thyroid gland (1). The effects of TSH follow its binding to a transmembrane receptor. Its complementary DNA (cDNA) has been cloned from thyroid cells in several species (2–6). According to its sequence, the TSH receptor belongs to the superfamily of the heterotrimeric G protein-coupled receptors. The best known signaling pathway of TSH in thyroid, identified long before its receptor, is one that involves an increase in cAMP production (7). Since then, however, other TSH signaling pathways have been described in thyroid (8–12).

Besides its expression in thyroid tissue, the presence of a TSH receptor in nonthyroid tissues has also been described. Birnbaumer and Rodbell reported the stimulation of cAMP production by TSH in adipocytes (13), in which TSH binding was characterized soon afterward (14, 15). Similarly, Pekonen and Weintraub reported the existence of TSH-binding sites at the surface of lymphocytes (16). More recently, ex-

pression of TSH receptor messenger RNA (mRNA) has been reported in both cell types (17, 18). These results strongly suggest that TSH may play another role besides regulating the thyroid gland (19). In fact, the presence of TSH in cerebrospinal fluid (20) and brain (21) has been described, raising the question of a hypothetical local function of TSH in the central nervous system.

A few years ago we described the existence of specific [particularly compared with LH/CG (22)] and saturable binding of radiolabeled TSH at the surface of astroglial cells (23) in primary cultures from newborn rat cerebrum. However, TSH failed, surprisingly, to enhance cAMP production in these cells, contrary to what was reported in thyroid. Instead, TSH stimulated the release of arachidonic acid (23). Moreover, we found that activity of the type II 5'-iodothyronine-deiodinase, known to be regulated by other factors in these cells (24), was potently stimulated by TSH in a sustained manner (23). In astroglial cells TSH also induced a stimulation of mitogen-activated protein kinase isozymes, Erk1 and Erk2 (25). Together, these results suggested that a functional TSH receptor was effectively expressed in these cells. Thus, although TSH exerts several effects in astroglial cells, uncoupling of TSH receptor from adenylyl cyclase may suggest the existence of a TSH receptor variant.

In this report we first determined the sequence of the corresponding cDNA in astrocytes. By *in situ* hybridization, using a specific riboprobe, we then showed that, as in thyroid, the TSH receptor gene was expressed in cultured astroglial cells and in brain cryoslices. The protein was detected with anti-TSH

Received June 20, 2000.

Address all correspondence and requests for reprints to: Dr. Bertrand Saunier, Bât. INSERM Gregory Pincus, Hôpital de Bicêtre, 80 rue du Général Leclerc, 94276 Le Kremlin-Bicêtre Cedex, France. E-mail: bsaunier@infobiogen.fr.

\* This work was supported in part by a grant from the Faculté de Médecine de Bicêtre (Université Paris XI, Orsay, France) and Program Tournesol (Ministère des Affaires Etrangères, Paris, France).

† Recipient of a postdoctoral fellowship from INSERM (Paris, France).

‡ Present address: Building 10, Room 8C112, National Institutes of Health, 9000 Rockville Pike, Bethesda, Maryland 20892. E-mail: bertrands@intra.niddk.nih.gov.

receptor antibodies in primary cultured astrocytes in humans and in brain cryoslices in both rats and humans.

## Materials and Methods

### Materials

DMEM, FCS, horse serum, trypsin-EDTA, PBS solution with 1:5000 EDTA (Versene), *Taq* polymerase, and reverse transcriptase (Superscript) were obtained from Life Technologies, Inc. (Gaithersburg, MD). Nucleic acid detection, digoxigenin (DIG) riboprobe, and PCR product purification kits were obtained from Roche (Indianapolis, IN). Rabbit anticow glial fibrillary acidic protein was obtained from DAKO Corp. (Carpenteria, CA), and horseradish peroxidase conjugate antiserum was purchased from Caltag Laboratories, Inc. (South San Francisco, CA). Antineurospecific enolase rabbit polyclonal antibody was a gift from Noel Lamande and Angelica Keller, and antineurofilament rabbit polyclonal antibody was obtained from Sigma (St. Louis, MO). Antidigoxigenin sheep polyclonal Fab fragments coupled to either alkaline phosphatase or fluorescein were obtained from Roche. Bluescript plasmid and DH5 $\alpha$  cells (*Escherichia coli*) were purchased from Stratagene (La Jolla, CA). The laser confocal microscope was purchased from Carl Zeiss [LSM410, (New York, NY)]; lens,  $\times 40$ ; 1.2 C-apochromat; excitation wavelengths:  $\lambda_{\text{FITC}} = 488 \text{ nm}$  and  $\lambda_{\text{rhodamine}} = 543 \text{ nm}$ ] and was driven by Philippe Leclerc (INSERM, Le Kremlin-Bicêtre, France).

### Sequencing of the TSH receptor cDNA

Total RNA was isolated, as previously described (26), from rat primary cultured astrocytes, and cDNA was then synthesized as previously described (27). The entire length of the astrocytic TSH receptor cDNA was sequenced by PCR with eight pairs of oligonucleotides (Fig. 1) designed from the sequence of the TSH receptor cDNA in rat thyroid cells (6): 1) 5'-ACAGCGCGCAACGATGAAGT-3' and 5'-GCAT-CAGGGTCTATGTAAGT-3'; 2) 5'-GCGACTGGAGCCACATTCTT-3' and 5'-GGAAGGAAGAGCAGTAACGC-3'; 3) 5'-CAAAGATGCATTGGAGGAG-3' and 5'-CCGATACTACTCTCATTAC-3'; 4) 5'-TAC-CCAAGTCACTGCTGTGC-3' and 5'-AAAGACATTGCCAGGAGAG-3'; 5) 5'-CAGGAAGAGACTCTACAAGC-3' and 5'-AGAAGGAAG-CAGCAAACCCA-3'; 6) 5'-TGCAACACGGCTGGTTTCTT-3' and 5'-TTCACATAGCAGGAGCAGAC-3'; 7) 5'-GTACATCGCCCTTGTTCTCC-3' and 5'-TGTTGGGACAGACTCTCTGG-3'; and 8) 5'-TTCATCCTACTCAGCAAGT-3' and 5'-AATACTCCCTAGAGATGAAC-3'. Both strands of the eight amplimers were then submitted to sequencing (PE Applied Biosystems, Foster City, CA) (28).

### Preparation of cultured cells

Astroglial cells were isolated from cerebrum of 2-day-old Sprague Dawley rats, as previously described (29, 30). After seeding in sterile chamber slides, cells were cultured in DMEM supplemented with 10% FCS until day 6. FCS was then replaced by horse serum, and the cells were further cultured until day 10. At the end of the culture period, the cells were rinsed twice with PBS solution, pH 7.4, then placed in a 4% paraformaldehyde solution and kept at 4 C until use. Human astrocytes

were cultured as previously described (31). For immunocytochemistry studies, human astrocytes were rinsed once with ice-cold PBS, incubated with ice-cold acetone for 10 min, then dried and kept at  $-20 \text{ C}$  until use.

### Plasmid construction and cloning for rat TSH receptor antisense RNA synthesis

Specific PCR primers were designed from the sequence of the rat TSH receptor cDNA (6), and one restriction site, for *EcoRI* or *HindIII* (underlined), respectively, was added to the 5'-end of each oligonucleotide: 5'-GTCAGAATTCGCTCTCCTGGGCAACGCTT-3' and 5'-GACTA-AGCTTGGCGAAGGTGATGGCATA-3'. The PCR product (see Fig. 1), of about 350 bp, was gel extracted, digested with both *EcoRI* and *HindIII* restriction enzymes, and inserted by ligation into a Bluescript plasmid, which was then transfected into competent DH5 $\alpha$  cells. Positive bacterial cell clones were selected and grown for plasmid extraction and purification (32). Then both strands were sequenced using primers corresponding to T3 and T7 promoters.

### In situ hybridization

Rat brains were fixed overnight in 4% paraformaldehyde in PBS and then incubated in 30% sucrose. Brain sections of 15  $\mu\text{m}$  were freeze-cut. TSH receptor riboprobes, sense and antisense, were synthesized with T3 or T7 RNA polymerase (see above). The riboprobes were DIG-labeled (DIG-deoxy-UTP), as described in the DIG-riboprobe kit protocol (Roche). The hybridization of TSH receptor mRNA in brain sections was performed overnight at 50 C with 10  $\mu\text{l}$  of probes (10–20 ng/ $\mu\text{l}$ ) in a solution containing 50% formamide, 5  $\times$  SSC (saline sodium citrate solution), 0.02% SDS, 5% blocking reagent, and 0.1% *N*-lauryl sarcosine. Washing was performed for 30 min at 50 C in 2  $\times$  SSC, for 20 min at 60 C in 2  $\times$  SSC plus 50% formamide, and for 30 min in 2  $\times$  SSC, then for 30 min in 1  $\times$  SSC at room temperature. Sections were rapidly rinsed in 100 mM Tris-HCl, pH 7.5, plus 150 mM NaCl and then incubated in blocking reagent. A conjugated antibody (anti-DIG alkaline phosphatase conjugate) was used to detect the probes, and a subsequent alkaline phosphatase-catalyzed color reaction was performed with X-phosphate and nitro blue tetrazolium salt producing a precipitate. The signal obtained with colloidal gold-coupled antibody (Roche) was enhanced by incubating the preparation for a few minutes with BL silver-enhancing blotting kit (British BioCell International, UK) and observed with polarized light. Five *in situ* hybridization experiments were performed independently, with four to five rats in each.

### Glial fibrillary acidic protein (GFAP), neuron-specific enolase (NSE), and neurofilament detection by immunofluorescence

Double staining was performed by *in situ* hybridization with TSH receptor RNA probes, and immunocytochemistry was performed with anti-GFAP, anti-NSE, or antineurofilament antibody. Immunodetection of the RNA probes was realized with an FITC-conjugated antibody (anti-DIG fluorescein isothiocyanate conjugate). After RNA detection, sections were incubated overnight with anti-GFAP (DAKO Corp.), anti-NSE, or antineurofilament antiserum diluted 1:50 in a solution of 0.1%

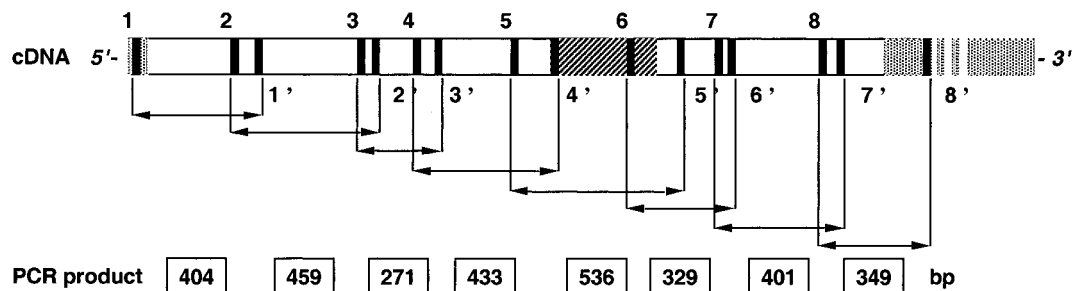

FIG. 1. Sequencing of the astrocyte TSH receptor cDNA. In astrocytes, this cDNA was sequenced with PCR (see *Materials and Methods*) from nucleotide 13 up to nucleotide 2470. In the thyroid, full-length cDNA is 5270 nucleotides long, translation start codon is nucleotides 60–62, and stop codon is nucleotides 2346–2348 (6). ▨, 5'- and part of 3'-untranslated regions; □, translated region; ■, PCR primers; ▩, region corresponding to the RNA probe used for *in situ* hybridization experiments (starting nucleotide 1336). The size of each PCR product is framed.



Triton X-100 in PBS and then with a 1:30 solution of F(ab')<sub>2</sub> goat anti-rabbit horseradish peroxidase-conjugate serum (Caltag Laboratories, Inc.) for 2 h. After washing twice with PBS, sections were placed on slides and mounted in Mowiol (mix of glycerol and polyvinyl alcohol) for observation. When possible, a colocalization pattern was determined that was the result of a computer-assisted pixel by pixel analysis. For each pixel, the intensity of the input signal in each wavelength channel was considered significant only when it was above a given threshold. For the significant pixels, these values were reported in a two-axis graph, each axis corresponding to one wavelength channel. A "colocalization cloud" was then obtained, that was submitted to further analysis to determine which pixels had the most significant input signal in both wavelength channels, simultaneously.

## Results

### Astrocyte TSH receptor cDNA sequencing

We first attempted to establish the sequence of the TSH receptor cDNA in astrocytes using specific primers designed from the sequence of the TSH receptor cDNA (GenBank access no. M34842) that was previously published (6). This was achieved with PCR experiments after a step of RT. We detected a transcript in total RNA extract from primary cultured rat brain astroglial cells (not shown). Therefore, we next performed additional RT-PCR experiments, using newly designed primers (see *Materials and Methods* and Fig. 1) to establish the sequence of the detected cDNA. These PCR products had the same apparent sizes as those observed in thyroid (not shown) and were subsequently sequenced. Comparison of our data to those in GenBank showed that the sequence of the TSH receptor cDNA in astrocytes was identical to that described in the thyroid (6).

### TSH receptor gene expression in primary cultured astrocytes

We then performed *in situ* hybridization experiments (Fig. 2) using RNA probes (see *Materials and Methods* and Fig. 1) corresponding to part of the last exon in the human TSH receptor gene (33) (as yet, the structure of the rat TSH receptor gene has not been determined). In primary cultured astroglial cells, the results of experiments performed with sense riboprobe were negative (not shown). With antisense riboprobe, this mRNA was detectable in only some cultured astrocytes, but then at a very high level (Fig. 2, A–C). Many positive cells were associated together in islets (Fig. 2B), but isolated-labeled cells were also found (Fig. 2, A and C). Whereas all of the TSH receptor mRNA-positive cells were also GFAP labeled (Fig. 2, D and E), GFAP-positive cells did not all express the TSH receptor gene (Fig. 2, F and G). In addition, none of the GFAP-negative cells was detected as TSH receptor positive.

### TSH receptor gene expression in the brain

To determine whether the TSH receptor mRNA was also detectable in the brain *in vivo*, we further performed *in situ* hybridization experiments in brain cryoslices. The results of experiments performed with sense riboprobe were negative (Fig. 3, B and D). In sharp contrast, staining was observed predominantly in discrete areas of young rats brains in experiments performed with antisense probe (Fig. 3, A and C).

On day 7 several regions of the brain were clearly stained (the hippocampus, piriform, and postcingulate cortex) as well as cell clusters at the base of the brain, which may

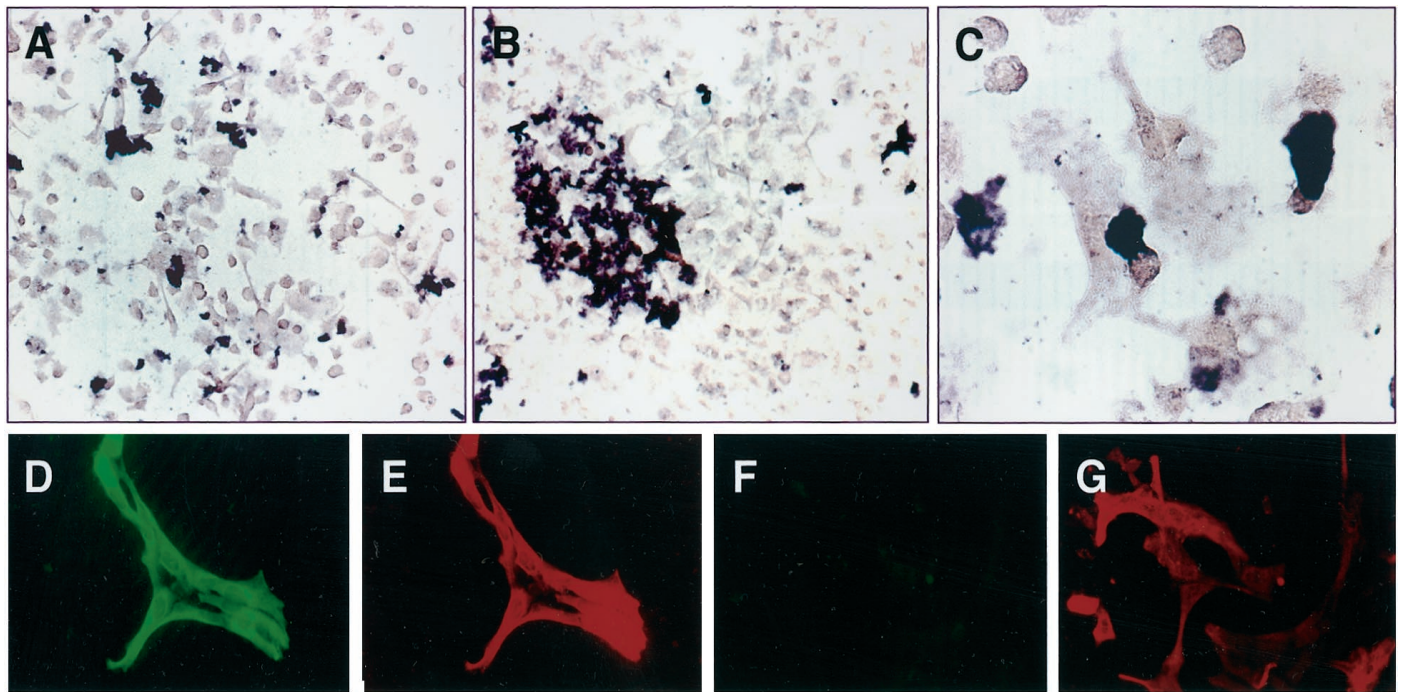

FIG. 2. Expression of the TSH receptor gene in rat primary cultured astrocytes. Astroglial cells were incubated with TSH receptor antisense riboprobe. Hybridization was then detected with phosphatase-coupled antibody and phosphatase-catalyzed color reaction (A–C) or FITC-coupled antibody (D and F). The cells were also incubated with anti-GFAP antibody (E and G), then with rhodamine-coupled antibody. Magnifications: A and B,  $\times 180$ ; D–G,  $\times 360$ ; C,  $\times 600$ .



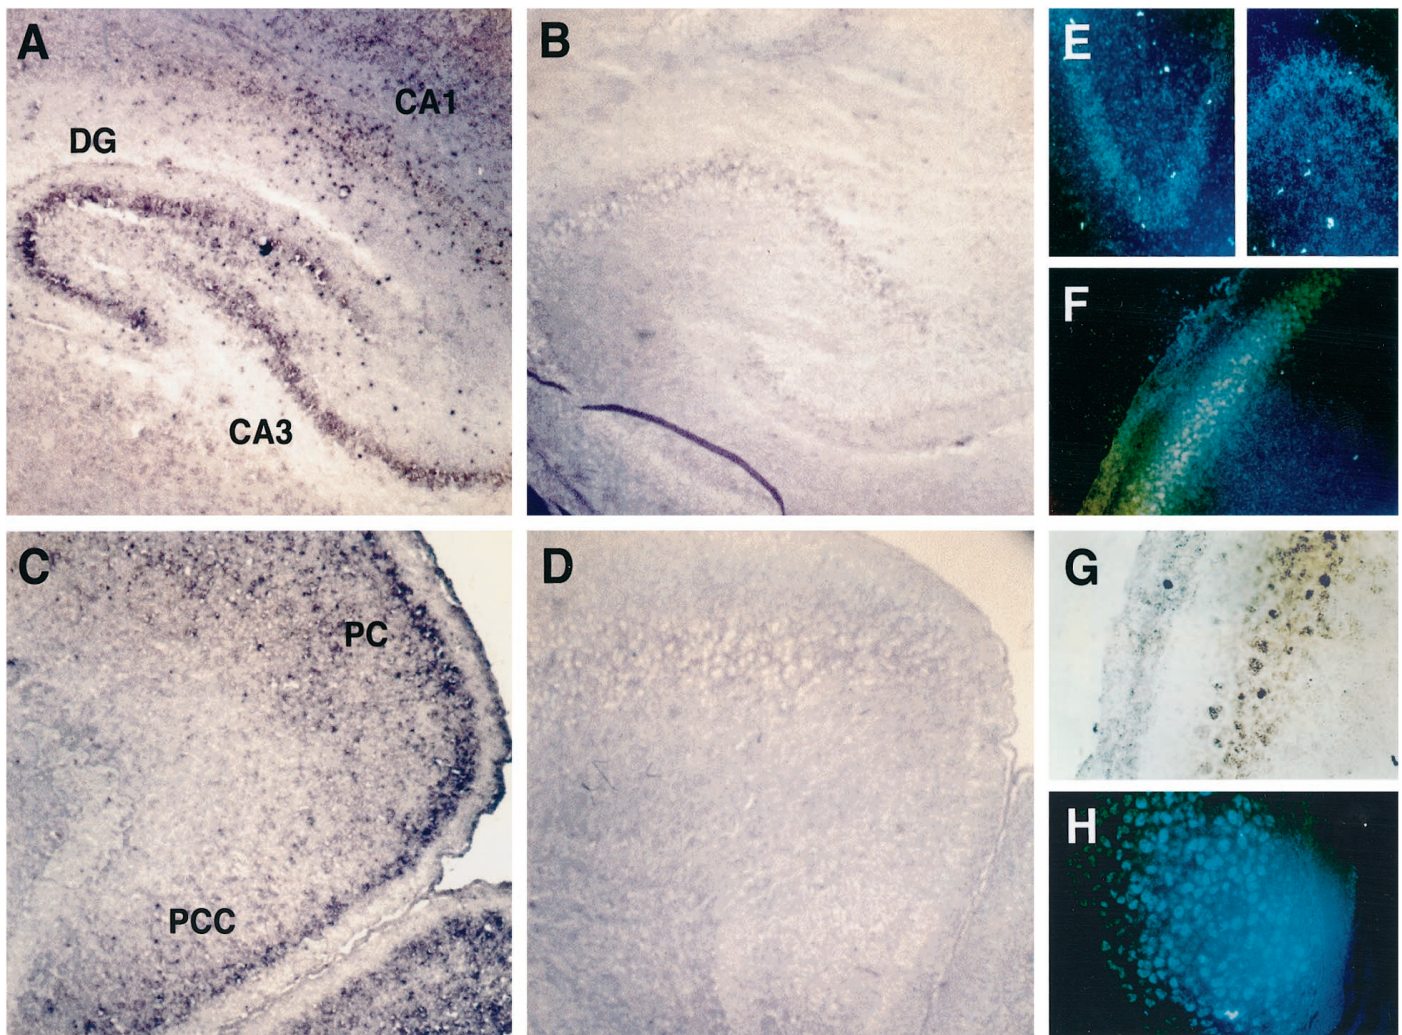

FIG. 3. *In situ* hybridization of TSH receptor antisense RNA in rat brain. Brain cryoslices of 7-day-old rat were fixed, then incubated with TSH receptor riboprobe (see *Materials and Methods*; B and D, sense riboprobe; A, C, and E–H, antisense riboprobe), and hybridization was detected as described in Fig. 2 (A–D) or with colloidal gold-coupled antibody (E–H). A–D, DG, Dentate gyrus; CA, Ammon's horn subfield; PCC, postcingulate cortex; PC, piriform cortex. E, Hippocampus: *left panel*, dentate gyrus; *right panel*, Ammon's horn. F and G, Piriform cortex in polarized (F) or nonpolarized light (G). H, Hypothalamus nucleus. Magnification: A–F,  $\times 90$ ; G and H,  $\times 180$ .

correspond to hypothalamic nuclei. Clear staining was also visualized in the area corresponding to or surrounding the ependymal cells layer. The choroid plexus and cerebellum (at the level of the Purkinje cell layer) were labeled as well as the meninges, albeit to a lesser extent (not shown). In the brain of 1-day-old rat, staining was weak in the hippocampus, piriform, and postcingulate cortex, but increased up to day 7, when it peaked, and then decreased progressively.

In the hippocampus, both the dentate gyrus and Ammon's horn were labeled (Fig. 3, A and E). However, staining was clearly most prominent in the granule cell layer of dentate gyrus. In Ammon's horn, staining was located at the level of the pyramidal cell layer and spatially decreased from the subfield CA4 to the subfield CA1. In piriform and postcingulate cortex, cortical layers 2–3 were the most stained in a pattern of adjoining spots, whereas in the fiber layer above no staining was detected (Fig. 3, F and G). In the deeper layers of the cortex (piriform and postcingulate cortex) and in the white matter below staining was observed; overall it was

much less than in layers 2–3, but contained a few intense spots (Fig. 3C) not corresponding to vessels. In the hypothalamus, only some nuclei were labeled (Fig. 3H). In the brains of adult rats, these regions were not stained.

#### *Combined TSH receptor mRNA and GFAP labeling in brain*

As some astrocytes in primary culture expressed the TSH receptor gene, we studied whether this was also the case in brain. Using laser confocal microscopy, TSH receptor mRNA was detected in the surrounding region of the hippocampus (Figs. 3A and 4A). Whereas many GFAP-positive cells were detected in this area (Fig. 4B), only a few of them expressed the TSH receptor gene (Fig. 4, C and D). Hence, most of the GFAP-positive cells were negative for the expression of TSH receptor mRNA (Fig. 4, B–D). The same result was observed in the areas beneath the piriform and postcingulate cortex (not shown).



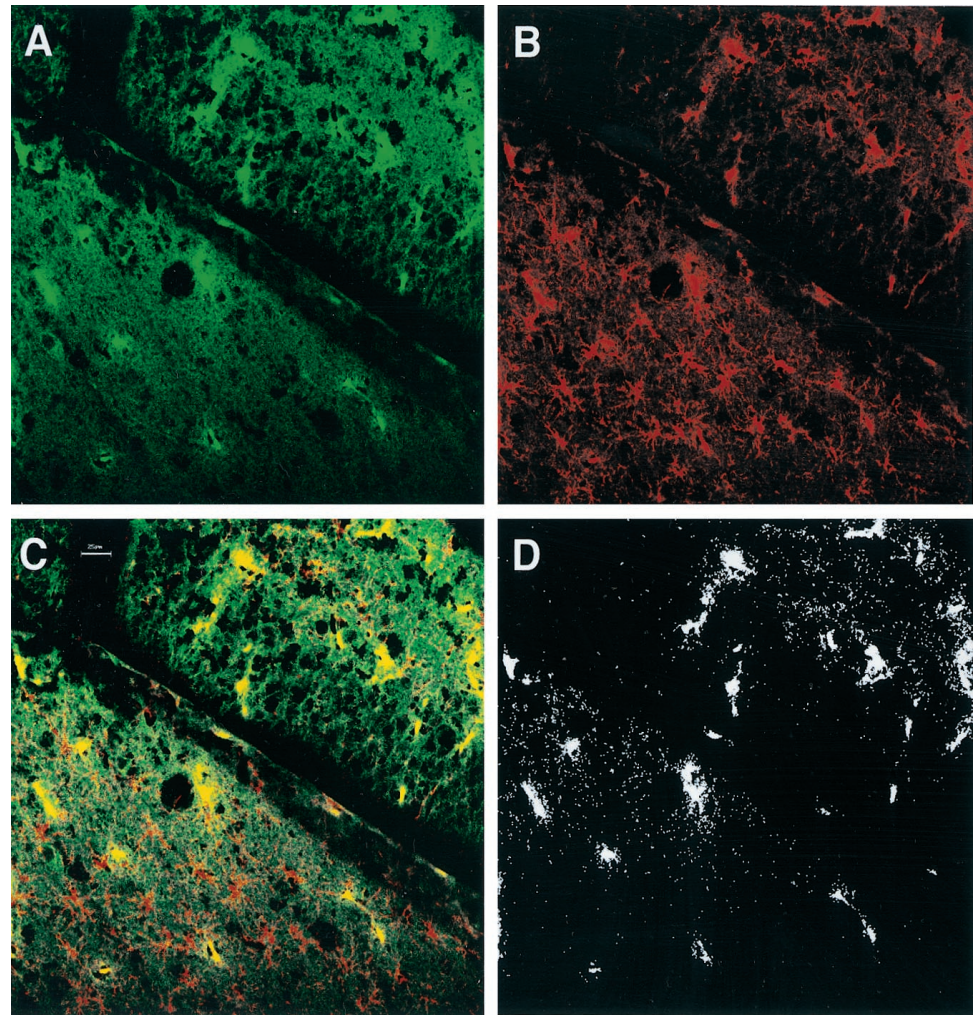

FIG. 4. Combined detection of TSH receptor mRNA and GFAP in rat brain. Rat brain cryoslices (hippocampus area) were incubated with both TSH receptor antisense riboprobe and anti-GFAP antibody. Hybridization/binding were revealed as described in Fig. 2. Then laser confocal microscopy analysis was performed in both fluorescein isothiocyanate (A) and rhodamine (B) wavelength channels. C, Superposition of A and B; D, colocalization pattern (see *Materials and Methods*). Scale bar, 25  $\mu$ m (C).

#### Combined TSH receptor mRNA and NSE labeling in brain

In the brain, the staining distribution suggested that the TSH receptor gene is expressed mainly within or in the neighborhood of neuron bodies. We therefore performed iterative labeling *in situ* experiments to determine whether *in vivo* the TSH receptor mRNA was colocalized with either NSE, a marker of neuronal cell bodies, or neurofilament, a marker of axons. Using laser confocal microscopy (Fig. 5), staining was detected in NSE-expressing cells in both piriform cortex (Fig. 5, A–D) and hippocampus (Fig. 5, E–L), suggesting that TSH receptor mRNA was indeed located within neuronal cells.

In the dentate gyrus many, but not all, cells expressing the TSH receptor gene were NSE positive (Fig. 5, E–H). This contrasted with the Ammon's horn's area where only a few cells were doubly labeled, but most were singly labeled (Fig. 5, I–L). Moreover, TSH receptor mRNA was not colocalized with axon-specific neurofilament (Fig. 5, M–O), suggesting that it was confined to the neuronal cell bodies (Fig. 5, P–R). We also noticed labeling consistent with the expression of the TSH receptor gene in surrounding blood vessels (Fig. 5, A–D), but it was not colocalized with other labeling.

#### Combined labeling in the ependymal cell and subventricular area

Interestingly, TSH receptor mRNA was detected in the ependymal cells layer, where coexpression with GFAP was sometimes detected, albeit at very low level (Fig. 6, A–D). It is, however, beneath the ependymal cell layer, in the subventricular zone, that dual labeling was mainly detected (Fig. 6, A–D). Moreover, in the cells of this area that expressed NSE (Fig. 6, E–G) or axon-specific neurofilament (not shown), TSH receptor mRNA was not detected. In the deeper structures of the brain, except for isolated cells, GFAP-positive cells generally did not express the TSH receptor gene (Fig. 6, A–D).

#### Expression of TSH receptor protein in human primary cultured astrocytes

In this work we also sought TSH receptor expression in primary cultured human astrocytes (31). After RT, PCR experiments allowed us to detect two overlapping PCR products corresponding to the full length of the human TSH receptor cDNA (3–5) (not shown). This suggested that the TSH receptor gene is also expressed in human astrocytes.

We further tested whether the TSH receptor itself could be



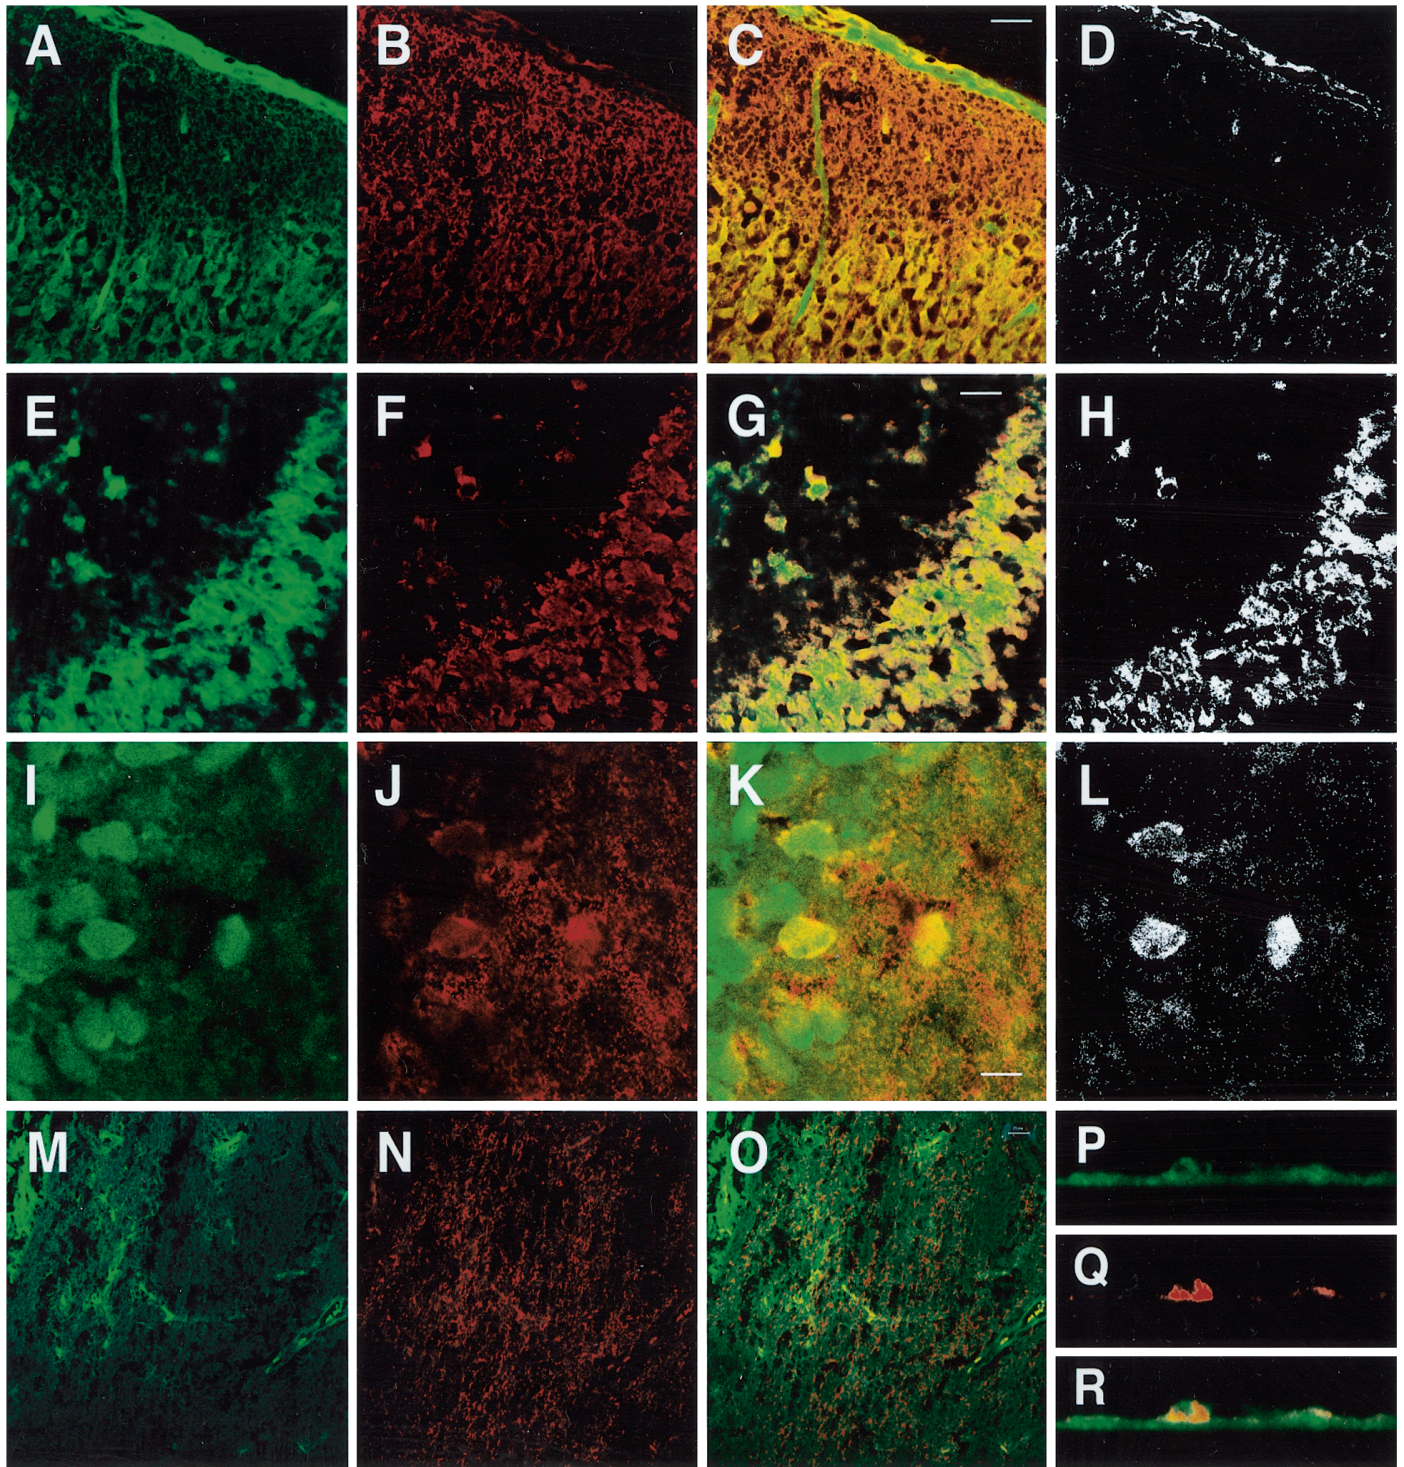

FIG. 5. Combined detection of TSH receptor mRNA and NSE in rat brain. Rat brain cryoslices were incubated with both TSH receptor antisense riboprobe (A, E, I, M, and P) and anti-NSE (B, F, J, and Q) or antineurofilament (N) antibody, then analysis was performed as described in Fig. 4. A–D, Piriform cortex; E–H, dentate gyrus; I–L, Ammon's horn; M–O, fasciculus of nerve fibers; P–R, Ammon's horn cells (transverse section analysis). Superpositions: C = A + B; G = E + F; K = I + J; O = M + N; R = P + Q. D, H, and L, Analysis of the colocalization patterns. Scale bars, 25  $\mu\text{m}$  (C, G, and O) or 10  $\mu\text{m}$  (K).

detected in these cells. Figure 7A shows that several astrocytes were labeled using antihuman TSH receptor antibody (provided by Edwin Milgrom), whereas no labeling was detected with nonspecific antibody (Fig. 7B). This labeling

was observed with three different antibodies, each directed against a distinct part of the extramembrane subunit of the human TSH receptor (34). This staining was abolished when the anti-TSH receptor antibody was first incubated with the



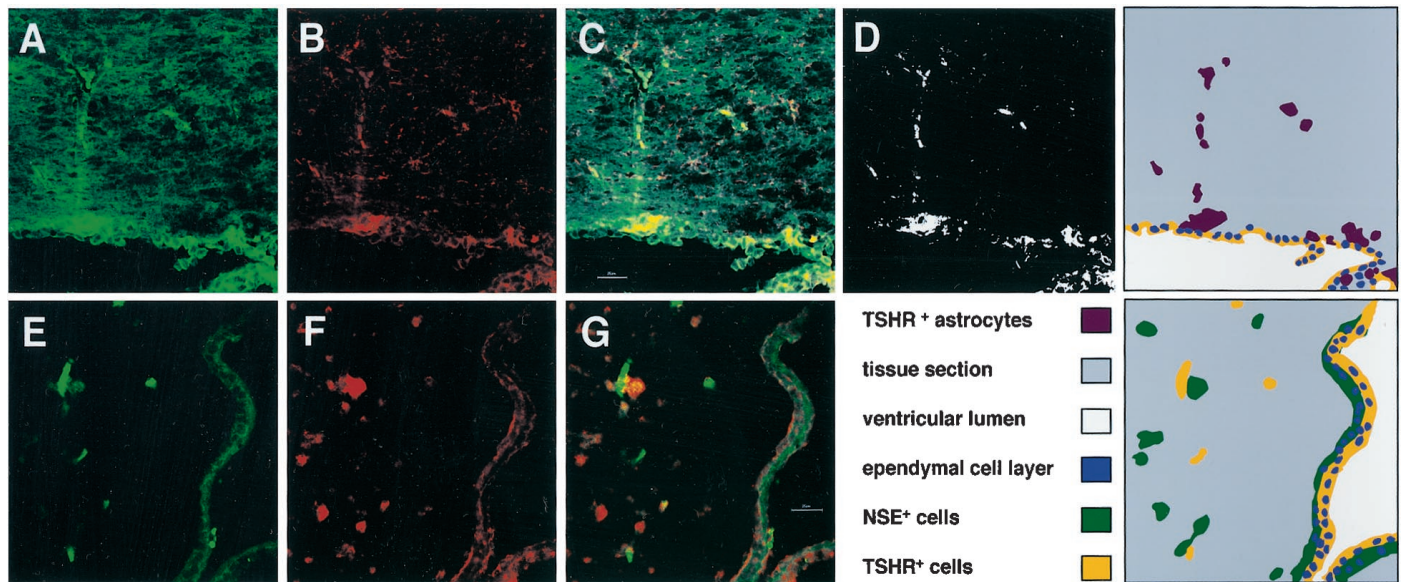

FIG. 6. Detection of TSH receptor mRNA in ependymal area. Brain cryoslices of the paraventricular area were incubated with TSH receptor antisense riboprobe (A and E) and anti-GFAP (B) or anti-NSE (F) antibody, then analyzed as described in Fig. 4. Superpositions: C = A + B, G = E + F. D, Analysis of the colocalization pattern. Scale bars, 25  $\mu$ m (C and D). The diagrams in the right panels show the localization of various cell types in the corresponding tissue sections.

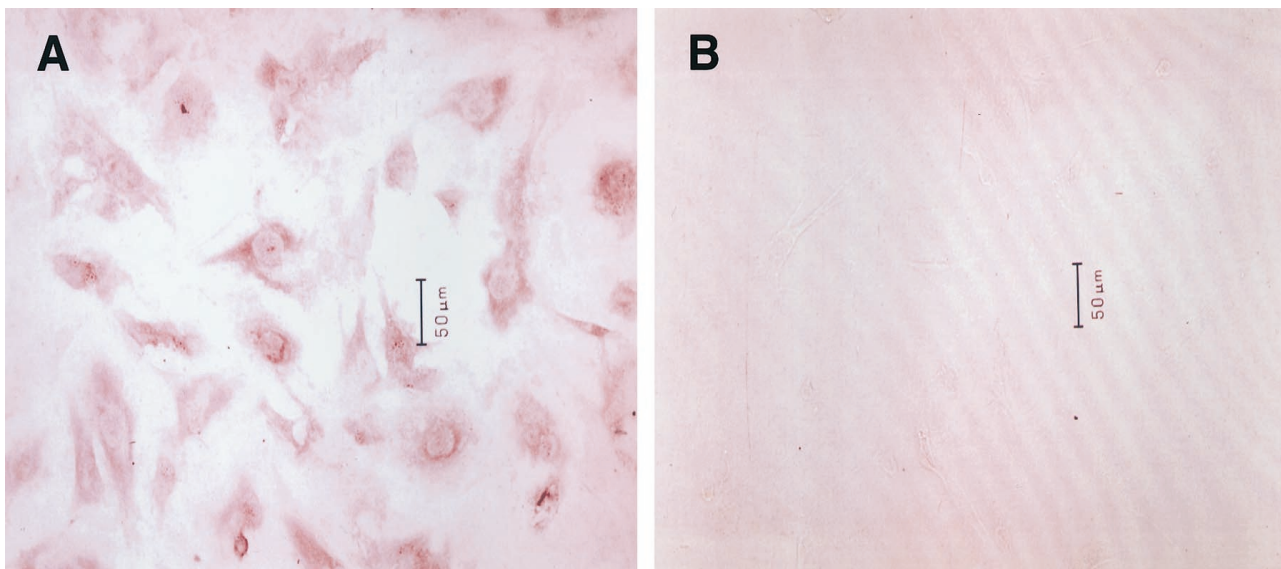

FIG. 7. Expression of the TSH receptor in human primary cultured astrocytes. Cultured astrocytes were fixed with ice-cold acetone, then incubated with either nonspecific (preimmune mouse IgG1 immunoglobulin; B) or anti-TSH receptor antibody (TSHR34; A). Binding was detected with peroxidase-coupled antibody and peroxidase-catalyzed color reaction (A and B). Preincubation of TSHR34 antibody with purified extracellular domain of the TSH receptor gave a result similar to that obtained in A.

purified extramembrane subunit of the human TSH receptor. Together these data suggested that the observed labeling was specific, and therefore that TSH receptor was indeed present in primary cultured human astrocytes.

We then looked for such an expression in both rat and human tissues in thyroid and brain. Experiments were performed to demonstrate that anti-TSH receptor antibody cross-reacted between human and rat thyroid (Fig. 8, A–D and G). Then, rat and human brain cryoslices were incubated with anti-TSH receptor antibody. Albeit stronger in humans, which may be explained by a higher affinity of this antibody

for the human TSH receptor compared with that in the rat, a positive signal was detected in both cases (Fig. 8, E and F, and H and I). This demonstrates that the TSH receptor transcript detected in the brain is translated *in vivo* as well.

### Discussion

The identification of the TSH receptor in nonthyroid tissue and the finding of TSH in brain and cerebrospinal fluid were reported several years ago. We had previously reported the existence of TSH-binding sites in primary cultured rat as-



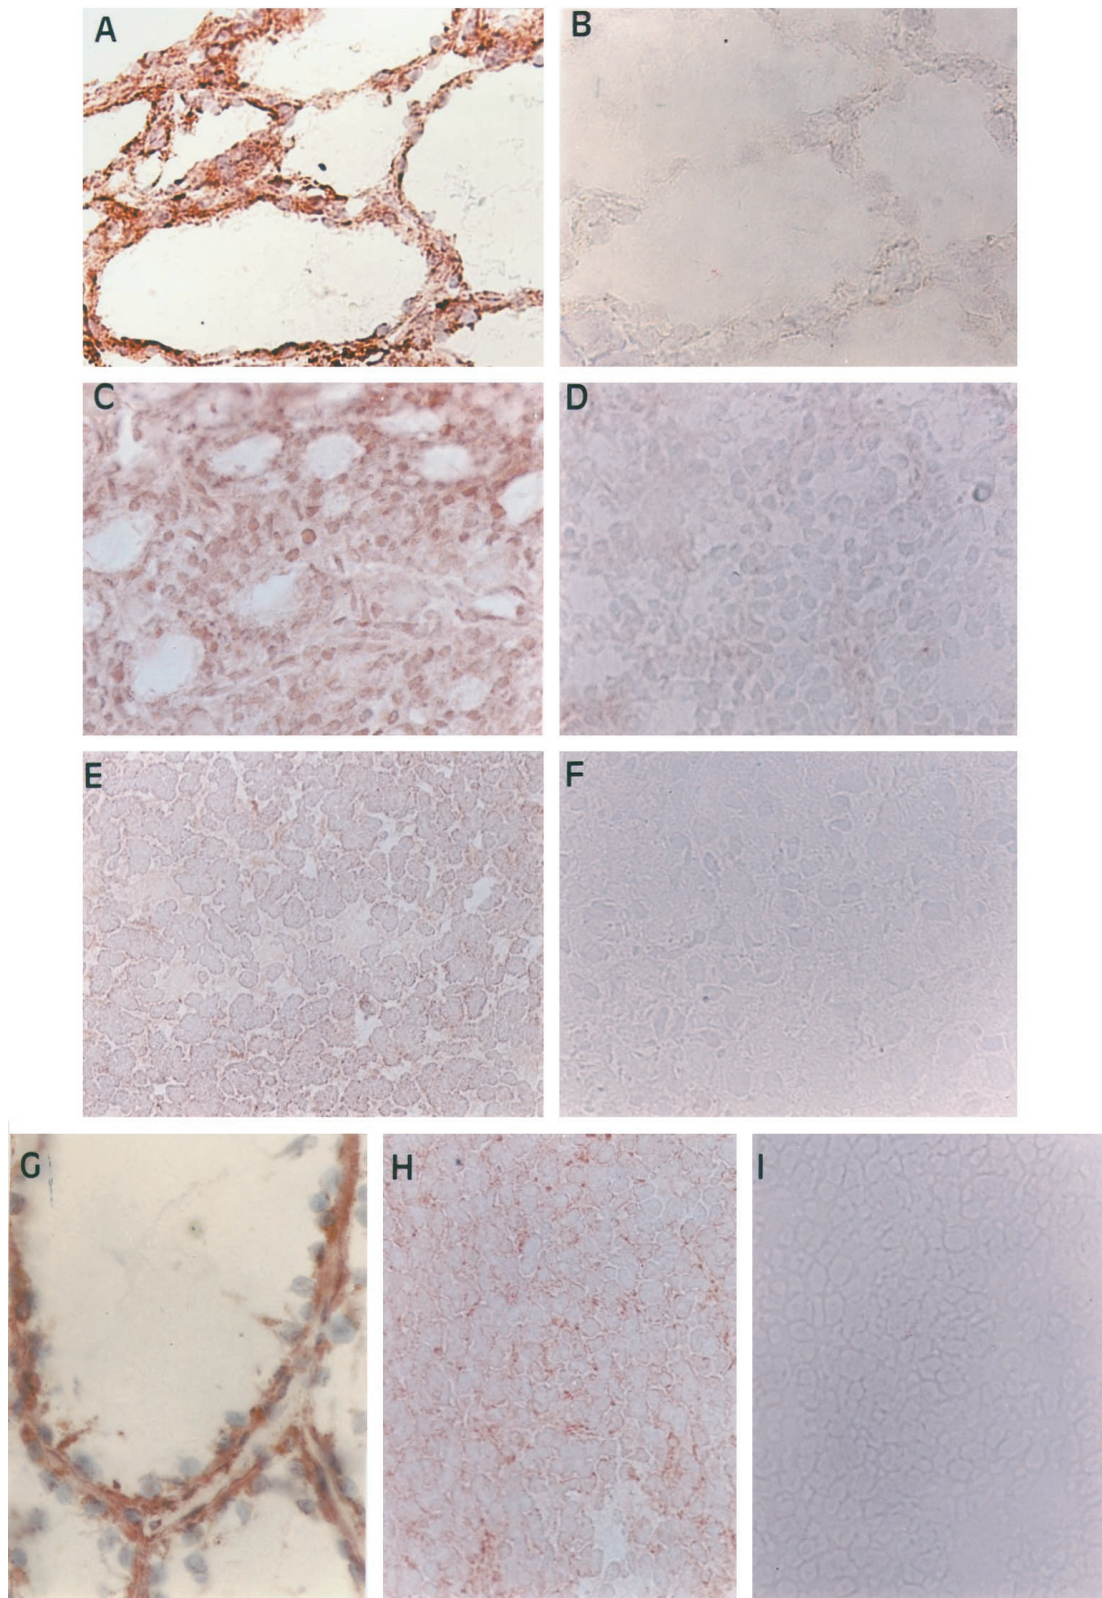

FIG. 8. Detection of the TSH receptor protein in both rat and human brain and thyroid tissue. A and B, Serial sections of adult rat thyroid gland immunostained with 2  $\mu\text{g}/\text{ml}$  of the anti-TSH receptor antibody TSHR34 (A) or preimmune mouse IgG1 Ig (B; negative control). C and D, Consecutive sections of 8-day-old rat thyroid gland immunostained with TSHR34 antibody (C) or IgG1 Ig (D; negative control). E and F, Consecutive sections of 8-day-old rat cerebral cortex immunolabeled with TSHR34 antibody (E) or control IgG1 Ig (F; magnification,  $\times 400$ ). G, Adult human thyroid gland immunostained with antibody TSHR34 (magnification,  $\times 1000$ ). H and I, Consecutive sections of human embryo cerebral cortex immunolabeled with TSHR34 antibody (H) or control Ig (I; magnification,  $\times 400$ ).



troglial cells (23), suggesting the expression of TSH receptor in these cells.

The possibility that TSH receptor was expressed in cultured astrocytes has been previously considered by others (35). Although adenylyl cyclase was functional in these cells and effectively coupled to other G protein-coupled receptors, the lack of stimulation of cAMP production by TSH led some authorities to believe that no functional TSH receptor was expressed in astrocytes (35). Nevertheless, our previous findings in astroglial cells were discordant with the interpretation that an absence of stimulation of cAMP production necessarily meant an absence of TSH receptor. Indeed, in these cells, we identified several TSH effects that appeared to be independent of stimulation of the cAMP pathway and yet still specific for this hormone (23, 25). Thus, all of these TSH effects were specifically blocked by monoclonal anti-TSH antibody, monoclonal anti-idiotypic anti-TSH antibody (36, 37), polyclonal anti-TSH receptor peptide antibody (38), and human Igs containing a high level of anti-TSH receptor-blocking activity (39, 40).

It is unlikely that the product of another TSH receptor gene could explain the uncoupling of adenylyl cyclase from the TSH receptor observed in astroglial cells (23). Indeed, according to the similar dimeric structure of the pituitary glycoprotein hormones (TSH, LH, and FSH) (41), the high sequence homology of the cDNAs (42), and the very close spatial structure (43) of their receptors, for evolutionary reasons (41) these striking similarities make unlikely the existence of another gene coding for a high affinity TSH receptor that would be completely different from that already identified. Lower affinity binding sites were also found in cultured astroglial cells (23), as also described in thyroid (44, 45). The concentration of TSH required to produce specific effects in astroglial cells (23, 25) tends, however, to indicate that high affinity binding sites mediate the effects of TSH. The existence of alternative spliced variants of the TSH receptor transcript has been observed in thyroid (46). In fact, we found that the TSH receptor cDNA in primary cultured rat astroglial cells was identical to that of the main type in rat thyroid cells. *A priori*, this result excluded that an alternate splicing of the TSH receptor pre-mRNA explains the change in functional coupling in astrocytes. Processing of the TSH receptor depends on the type of cell in which it is expressed (47). Such posttranslational differences might tentatively explain the uncoupling of this receptor from adenylyl cyclase in astrocytes.

Using a riboprobe corresponding to the TSH receptor gene, the expression of which was previously identified in thyroid and now in cultured astrocytes, we observed two main types of localization. One type of localization was transient, in neuronal cells, and mostly found in the dentate gyrus of the hippocampus. This was established by detection of TSH receptor mRNA in NSE-positive cells, with laser confocal microscopy analysis. The other localization was in astrocytes, in accordance with our previous reports. The latter expression was mostly detected in the ependymal and subventricular areas. This restriction of expression is, perhaps, comparable to our present observation of primary cultured rat and human cells that suggests that TSH receptor expression is confined to particular astrocytes.

Albeit as yet unknown, the pattern of this expression may

suggest various physiological roles. In a previous report we formulated the hypothesis that TSH receptor expression in the brain may be involved in local thyroid homeostasis when we reported the stimulation of type II iodothyronine deiodinase activity with TSH in astrocytes (23). This is consistent with the pattern of expression of type II iodothyronine deiodinase in the brain, predominating in astrocytes and in tanycytes of the ependymal area (48). In addition, the description by others of TSH receptor gene expression in sheep hypothalamus (49) may be consistent with a neuroendocrine feedback of TSH upon TRH release or expression, for example.

The pattern of expression suggests additional physiological roles. In the dentate gyrus, where TSH receptor gene expression in neuronal cells culminated, neuronal precursors have been observed in rodents (50, 51). Progenitor cells, which can ultimately differentiate into both neuronal and astroglial cells (52), are found in the central system during development. Most precursors migrate toward their final location, and they fully differentiate (53). Whereas astroglial cells are well known to keep a potential for proliferation in adult brain, neurons were thought, until recently (50, 51), to have lost this potential. Moreover, enhancement of the TSH receptor transcript level in the brain coincided with a dramatic rise in thyroid hormone  $\beta$ -receptor expression (54, 55). The thyroid system is implicated in neural development within the neonatal period (56). It was therefore tempting to link the enhancement of expression of TSH receptor to that of thyroid hormone  $\beta$ -receptor, perhaps in relationship with the commitment of neuronal precursors in the brain at birth.

Finally, further reports have appeared recently in the literature, consistent with the persistence of stem cells in the central nervous system of adult mammals (57–59). It is generally accepted that embryonic stem cells are initially located within the inner part of the central nervous system. Later, this part will give rise to the ependymal and subventricular areas. As one might expect, stem cells in the adult were found mostly within the ependymal cells layer (57) and/or astrocytes of the subventricular zone (58). Whether astroglial and neuronal intermediary precursors are obligatory steps in their ultimate differentiation process is still under debate (59). Coincidentally, in our study TSH receptor gene expression in NSE-negative cells culminated in those latter areas. Although not yet proved, our observations are consistent with an expression in brain precursor and/or stem cells. This hypothesis would satisfactorily explain the prominent labeling of neuronal cells in the dentate gyrus, the staining detected in ependymal cells and astrocytes of the subventricular zone, and the existence of isolated GFAP-positive cells that might correspond to migrating cells.

The factors allowing TSH receptor expression in the brain remain unknown. Interestingly, TSH receptor gene expression in the hippocampus and cortex was regulated throughout the neonatal period (our data) and correlated positively with the level of circulating TSH in serum (60). In humans, a peak of TSH is also detectable in serum after birth, although it lasts only a few hours (61). In thyroid, TSH-induced regulation of TSH receptor expression has been reported (6), suggesting that TSH may also regulate TSH receptor expression in the brain. In the thyroid, this regulation was, however,

cAMP dependent; such a mechanism was excluded in astrocytes (23). Nevertheless, other processes have been implicated in TSH receptor expression in the thyroid, such as TTF-1 transcription factor (1). Albeit its expression in the thyroid gland is well known, TTF-1 is, in fact, also important during brain development (62). Moreover, its activity was reported to be regulated in a cAMP-independent manner in nonthyroid tissue (63). Therefore, this left open the possibility for TSH to regulate this expression through TTF-1 in astrocytes also. The presence of TSH or TSH-like peptide in the brain and cerebrospinal fluid that has been reported in rats and primates (21) and in humans (20) might, therefore, be of physiological relevance.

Taken together, our results demonstrate the expression of the TSH receptor gene in both neurons and astrocytes in the brain. Whether TSH receptor expression in the brain is related to the commitment of precursor or stem cells after birth and with the increased level of TSH observed in the serum or plays a role later, as suggested by the more frequent occurrence of neurodegenerative disorders during hypothyroidism with elevated level of circulating TSH (64) or by the description of enhanced TSH receptor expression in Alzheimer's disease (65), are questions remaining to be addressed.

### Acknowledgments

We express our gratitude to Jasmine Parma, Françoise Miot, Marc Parmentier, Viviane Pohl, and Jacques E. Dumont (Institut de Recherche Interdisciplinaire en Biologie Humaine et Nucléaire, Université Libre de Bruxelles, Brussels, Belgium); Pierre Carayon (Faculté de Médecine La Timone, Marseille, France); Jacques Orgiazzi (Faculté de Médecine Lyon-Sud, Pierre-Bénite, France); Philippe Leclerc (Service INSERM de Microscopie Confocale, Le Kremlin-Bicêtre, France); Edwin Milgrom (U-135, INSERM, Le Kremlin-Bicêtre, France); Leonard D. Kohn (NIDDK, NIH, Bethesda, MD); and Louis Sokoloff (NIMH, NIH, Bethesda, MD) for help, discussion, and/or material.

### References

- Condliffe PG, Bakke JL, Odell WD, Utiger RD, Lowenstein JM, Hargadine JR, Greenspan FS, Guillemin R, Vale W, Burgus R, Robbins J, Rall JE 1973 Thyroid stimulating hormone (TSH). In: Berson SA, Yalow RS (eds) *Methods in Investigative and Diagnostic Endocrinology*. Elsevier, New York, pp 447-507
- Parmentier M, Libert F, Maenhaut C, Lefort A, Gérard C, Perret J, Van Sande J, Dumont JE, Vassart G 1989 Molecular cloning of the thyrotropin receptor. *Science* 246:1620-1622
- Nagayama Y, Kaufman K, Seto P, Rapoport B 1989 Molecular cloning, sequence and functional expression of the cDNA for the human thyrotropin receptor. *Biochem Biophys Res Commun* 165:1184-1190
- Libert F, Lefort A, Gérard C, Parmentier M, Perret J, Ludgate M, Dumont J, Vassart G 1989 Cloning, sequencing and expression of the human thyrotropin (TSH) receptor: evidence for binding of autoantibodies. *Biochem Biophys Res Commun* 165:1250-1255
- Misrahi M, Loosfelt H, Atger M, Sar S, Guiochon-Mantel A, Milgrom E 1990 Cloning, sequencing and expression of human TSH receptor. *Biochem Biophys Res Commun* 166:394-403
- Akamizu T, Ikuyama S, Saji M, Kosugi S, Kozak C, McBride OW, Kohn LD 1990 Cloning, chromosomal assignment, and regulation of the rat thyrotropin receptor: expression of the gene is regulated by thyrotropin, agents that increase cAMP levels, and thyroid autoantibodies. *Proc Natl Acad Sci USA* 87:5677-5681
- Robison GA, Butcher RW, Sutherland EW 1968 Cyclic AMP. *Annu Rev Biochem* 37:149-174
- Kupperman E, Wen W, Meinkoth JL 1993 Inhibition of thyrotropin-stimulated DNA synthesis by microinjection of inhibitors of cellular Ras and cyclic AMP-dependent protein kinase. *Mol Cell Biol* 13:4477-4484
- Saunier B, Tournier C, Jacquemin C, Pierre M 1995 Stimulation of mitogen-activated protein kinase by thyrotropin in primary cultured human thyroid follicles. *J Biol Chem* 270:3693-3697
- Laugwitz K-L, Allgeier A, Offermanns S, Spicher K, Van Sande J, Dumont JE, Schultz G 1996 The human thyrotropin receptor: a heptahelical receptor capable of stimulating members of all four G protein families. *Proc Natl Acad Sci USA* 93:116-120
- Corda D, Marcocci C, Kohn LD, Axelrod J, Luini A 1985 Association of the changes in cytosolic  $Ca^{2+}$  and iodide efflux induced by thyrotropin and by the stimulation of  $\alpha 1$ -adrenergic receptors in cultured rat thyroid cells. *J Biol Chem* 260:9230-9236
- Field JB, Ealey PA, Marshall NJ, Cockcroft S 1987 Thyroid-stimulating hormone stimulates increases in inositol phosphates as well as cyclic AMP in the FRTL-5 rat thyroid cell line. *Biochem J* 247:519-524
- Birnbaumer L, Rodbell M 1969 Adenyl cyclase in fat cells. II. Hormone receptors. *J Biol Chem* 244:3477-3482
- Winand RJ, Kohn LD 1972 The binding of ( $^3H$ )-thyrotropin and an ( $^3H$ )-labeled exophthalmogenic factor by plasma membranes of retro-orbital tissue. *Proc Natl Acad Sci USA* 69:1711-1715
- Teng CS, Rees Smith B, Anderson J, Hall R 1975 Comparison of thyrotrophin receptors in membranes prepared from fat and thyroid tissue. *Biochem Biophys Res Commun* 66:836-841
- Pekonen E, Weintraub B 1978 Thyrotropin binding to cultured lymphocytes and thyroid cells. *Endocrinology* 103:1668-1677
- Roselli-Rehfuß L, Robbins LS, Cone R 1992 Thyrotropin receptor messenger ribonucleic acid is expressed in most brown and white adipose tissues in the guinea pig. *Endocrinology* 130:1857-1861
- Francis T, Burch HB, Cai WY, Lukes Y, Peele M, Carr FE, Wartofsky L, Burman KD 1991 Lymphocytes express thyrotropin receptor-specific mRNA as detected by the PCR technique. *Thyroid* 1:223-228
- Wang J, Whetsell M, Klein JR 1997 Local hormone networks and intestinal T cell homeostasis. *Science* 275:1937-1939
- Schaub C, Bluet-Pajot MT, Szikla G, Lornet C, Talairach J 1977 Distribution of growth hormone and thyroid-stimulating hormone in cerebrospinal fluid and pathological compartments in the central nervous system. *J Neurol Sci* 31:123-131
- Hojvat S, Baker G, Kirsteins L, Lawrence AM 1982 TSH in the rat and monkey brain: distribution, characterization and effect of hypophysectomy. *Neuroendocrinology* 34:327-332
- Lei ZM, Rao ChV, Kornyei JL, Licht P, Hiatt ES 1993 Novel expression of human chorionic gonadotropin/luteinizing hormone receptor in brain. *Endocrinology* 132:2262-2270
- Saunier B, Pierre M, Jacquemin C, Courtin F 1993 Evidence for cAMP-independent thyrotropin effects on astroglial cells. *Eur J Biochem* 218:1091-1094
- Larsen PR 1997 Update on the human iodothyronine selenodeiodinases, the enzymes regulating the activation and inactivation of thyroid hormone. *Biochem Soc Trans* 25:588-592
- Tournier C, Gavaret J-M, Jacquemin C, Pierre M, Saunier B 1995 Stimulation of mitogen-activated protein kinase by thyrotropin in astrocytes. *Eur J Biochem* 228:16-22
- Chomczynski P, Sacchi N 1987 Single-step method of RNA isolation by acid guanidium thiocyanate-phenol-chloroform extraction. *Anal Biochem* 162:156-159
- Wisniewski D, Strife A, Clarkson B 1991 Co-detection of chimeric bcr/abl (target) and beta-actin (control) messenger RNA in individual CFU-GM colonies derived from CML patients using the polymerase chain reaction. *Leuk Res* 15:867-874
- McBride LJ, Koepf SM, Gibbs RA, Salser W, Mayrand PE, Hunkapiller MW, Kronick MN 1989 Automated DNA sequencing methods involving polymerase chain reaction. *Clin Chem* 35:2196-2
- Manthorpe M, Adler R, Varon S 1979 Development, reactivity and GFA immunofluorescence of astroglia-containing monolayer cultures from rat cerebrum. *J Neurocytol* 8:605-621
- Pierre M, Gavaret J-M, Matricon C, Pomerance M, Jacquemin C, Toru-Delbauffe D 1988 Activation of an S6 kinase from rat astroglial cells by cAMP. *FEBS Lett* 228:219-222
- Hery C, Sebire G, Peudenié S, Tardieu M 1995 Adhesion to human neurons and astrocytes of monocytes: the role of interaction of CR3 and ICAM-1 and modulation by cytokines. *J Neuroimmunol* 57:101-119
- Dorin M, Bornecque CA 1995 Fast separations of plasmid DNA using discontinuous gradients in the preparative ultracentrifuge. *BioTechniques* 18:90-92
- Gross B, Misrahi M, Sar S, Milgrom E 1991 Composite structure of the human thyrotropin receptor gene. *Biochem Biophys Res Commun* 177:679-687
- Loosfelt H, Pichon C, Jolivet A, Misrahi M, Caillou B, Jamous M, Vannier B, Milgrom E 1992 Two-subunit structure of the human thyrotropin receptor. *Proc Natl Acad Sci USA* 89:3765-3769
- Murphy S, Pearce B 1987 Functional receptors for neurotransmitters on astroglial cells. *Neuroscience* 22:381-394
- Costagliola S, Madec AM, Benkirane MM, Orgiazzi J, Carayon P 1988 Monoclonal antibody approach to the relationship between immunological structure and biological activity of thyrotropin. *Mol Endocrinol* 2:613-618
- Costagliola S, Ruf J, Durand-Gorde MJ, Carayon P 1991 Monoclonal anti-idiotypic antibodies interact with the 93 kilodalton thyrotropin receptor and exhibit heterogeneous biological activities. *Endocrinology* 128:1555-1562
- Ban T, Kosugi S, Kohn LD 1992 A specific antibody to the thyrotropin (TSH) receptor identifies multiple receptor forms in membranes of cells transfected



- with wild type receptor cDNA: characterization of their relevance to receptor synthesis, processing, and structure. *Endocrinology* 131:815–829
39. **Madec A-M, Clavel S, Stefanutti A, Orgiazzi J** 1988 Blocking anti-thyrotropin receptor antibodies desensitize cultured human thyroid cells. *Endocrinology* 123:2062–2066
  40. **Saunier B, Madec A-M, Corrèze C, Orgiazzi J** 1991 Analysis of anti-TSH receptor blocking antibody (TBKAb) effects on the adenyl cyclase stimulating guanine nucleotide binding protein (Gs) in thyroid membranes. In: Gordon, Gross, Hennemann (eds) *Progress in Thyroid Research*. Balkema, Rotterdam, pp 465–467
  41. **Grossmann M, Weintraub BD, Szkudlinski MW** 1997 Novel insights into the molecular mechanisms of human thyrotropin action: structural, physiological, and therapeutic implications for the glycoprotein hormone family. *Endocr Rev* 18:476–501
  42. **Segaloff DL, Sprengel R, Nikolic K, Ascoli M** 1990 Structure of the lutropin/choriogonadotropin receptor. *Recent Prog Horm Res* 46:261–301
  43. **Jiang X, Dreano M, Buckler DR, Cheng S, Ythier A, Wu H, Hendrickson WA, el Tayar N** 1995 Structural predictions for the ligand-binding region of glycoprotein hormone receptors and the nature of hormone-receptor interactions. *Structure* 3:1341–1353
  44. **Kotani M, Kariya T, Field JB** 1975 Studies of thyroid-stimulating hormone binding to bovine thyroid plasma membranes. *Metabolism* 24:959–971
  45. **Tate RL, Schwartz HI, Holmes JM, Kohn LD** 1975 Thyrotropin receptors in thyroid plasma membranes. Characteristics of thyrotropin binding and solubilization of thyrotropin receptor activity by tryptic digestion. *J Biol Chem* 250:6509–6515
  46. **Libert F, Parmentier M, Maenhaut C, Lefort A, Gerard C, Perret J, Van Sande J, Dumont JE, Vassart G** 1990 Molecular cloning of a dog thyrotropin (TSH) receptor variant. *Mol Cell Endocrinol* 68:R15–R17
  47. **Misrahi M, Ghinea N, Sar S, Saunier B, Jolivet A, Loosfelt H, Cerutti M, Devauchelle G, Milgrom E** 1994 Processing of the precursors of the human thyroid-stimulating hormone receptor in various eukaryotic cells (human thyrocytes, transfected L cells and baculovirus-infected insect cells). *Eur J Biochem* 222:711–719
  48. **Guadano-Ferraz A, Obregon MJ, St Germain DL, Bernal J** 1997 The type 2 iodothyronine deiodinase is expressed primarily in glial cells in the neonatal brain. *Proc Natl Acad Sci USA* 94:10391–10396
  49. **Bockmann J, Winter C, Wittkowski W, Kreutz MR, Bockers TM** 1997 Cloning and expression of a brain-derived TSH receptor. *Biochem Biophys Res Commun* 238:173–178
  50. **Kuhn HG, Dickinson-Anson H, Gage FH** 1996 Neurogenesis in the dentate gyrus of the adult rat: age-related decrease of neuronal progenitor proliferation. *J Neurosci* 16:2027–2033
  51. **Gould E, McEwen BS, Tanapat P, Galea LAM, Fuchs E** 1997 Neurogenesis in the dentate gyrus of the adult tree shrew is regulated by psychosocial stress and NMDA receptor activation. *J Neurosci* 17:2492–2498
  52. **Williams BP, Price J** 1995 Evidence for multiple precursor cell types in the embryonic rat cerebral cortex. *Neuron* 14:1181–1188
  53. **Hatten ME** 1999 Central nervous system neuronal migration. *Annu Rev Neurosci* 22:511–539
  54. **Mellström B, Naranjo JR, Santos A, Gonzales AM, Bernal J** 1991 Independent expression of the  $\alpha$  and  $\beta$  *c-erbA* genes in developing rat brain. *Mol Endocrinol* 5:1339–1350
  55. **Bradley DJ, Towle HC, Young III WS** 1992 Spatial and temporal expression of  $\alpha$ - and  $\beta$ -thyroid hormone receptor mRNAs, including the  $\beta$ 2-subtype, in the developing mammalian nervous system. *J Neurosci* 12:2288–2302
  56. **Legrand J** 1986 Thyroid hormone effects on growth and development. In: Henneman G (ed) *Thyroid Hormone Metabolism*. Marcel Dekker, New York, pp 503–534
  57. **Johansson CB, Momma S, Clarke DL, Risling M, Lendahl U, Frisén J** 1999 Identification of a neural stem cell in the adult mammalian central nervous system. *Cell* 96:24–25
  58. **Doetsch F, Caillé I, Lim DA, Garcia-Verdugo JM, Alvarez-Buylla A** 1999 Subventricular zone astrocytes are neural stem cells in the adult mammalian brain. *Cell* 97:703–716
  59. **Chiasson BJ, Troepepe V, Morshead CM, van der Kooy D** 1999 Adult mammalian forebrain ependymal and subependymal cells demonstrate proliferative potential, but only subependymal cells have neural stem cells characteristics. *J Neurosci* 19:4462–4471
  60. **Dussault JH, Labrie F** 1975 Development of the hypothalamic-pituitary-thyroid axis in the neonatal rat. *Endocrinology* 97:1321–1324
  61. **Sack J, Fisher DA, Wang CC** 1976 Serum thyrotropin, prolactin, and growth hormone levels during the early neonatal period in the human infant. *J Pediatr* 89:298–300
  62. **Bingle CD** 1997 Thyroid transcription factor-1. *Int J Biochem Cell Biol* 29:1471–1473
  63. **Suzuki K, Lavaroni S, Mori A, Okajima F, Kimura S, Katoh R, Kawaoi A, Kohn LD** 1998 Thyroid transcription factor 1 is calcium modulated and coordinately regulates genes involved in calcium homeostasis in C cells. *Mol Cell Biol* 18:7410–7422
  64. **Ganguli M, Burmeister LA, Seaberg EC, Belle S, DeKosky ST** 1996 Association between dementia and elevated TSH: a community-based study. *Biol Psychiatry* 40:714–725
  65. **Labudova O, Cairns N, Koeck T, Kitzmueller E, Rink H, Lubec G** 1999 Thyroid stimulating hormone-receptor overexpression in the brain of patients with Down syndrome and Alzheimer's disease. *Life Sci* 64:1037–1044
